# Supplementary material for: The Psychosocial Impact of COVID-19 on Older Adults with Cancer: A Rapid Review
Source: MDPI journal article supplement (doi:10.3390/curroncol29020053), 2022-01-28
Supplement: s1 [file s1]

**Listing S1. Search Strategy.**

**Search terms- MEDLINE(OVID)**

Ovid MEDLINE(R) ALL <1946 to July 26, 2021>

- 1 exp Coronavirus/ 85818
- 2 exp Coronavirus Infections/ 104836
- 3 (coronavirus\* or corona virus\* or OC43 or NL63 or 229E or HKU1 or HCoV\* or ncov\* or covid\* or sars-cov\* or sarscov\* or Sars-coronavirus\* or Severe Acute Respiratory Syndrome Coronavirus\* or "novel betacov" or "novel betacoronavirus").mp. 176694
- 4 ((pneumonia or covid\* or coronavirus\* or corona virus\* or ncov\* or 2019-ncov or sars\*).mp. or exp pneumonia/) and Wuhan.mp. 5588
- 5 (2019-ncov or ncov19 or ncov-19 or 2019-novel CoV or sars-cov2 or sars-cov-2 or sarscov2 or sarscov-2 or Sars-coronavirus2 or Sars-coronavirus-2 or SARS-like coronavirus\* or coronavirus-19 or covid19 or covid-19 or covid 2019 or ((novel or new or nouveau) adj2 (CoV or nCoV or covid or coronavirus\* or corona virus or Pandemi\*2)) or ((covid or covid19 or covid-19) and pandemic\*2) or (coronavirus\* and pneumonia)).mp. 161448
- 6 COVID-19.mp. 153723
- 7 1 or 2 or 3 or 4 or 5 or 6 182685
- 8 exp Neoplasms/ 3507441
- 9 (neoplasm\* or cancer\* or leukaemi\* or leukemia\* or leukeni\* or tumour\* or tumor\* or malignan\* or carcino\* or lymphoma\* or adenocarcinoma\* or radioth\* or radiat\* or irradiat\* or radiochemo\* or chemotherap\* or (bone adj marrow adj5 transplant\*)).mp. [mp=title, abstract, original title, name of substance word, subject heading word, floating sub-heading word, keyword heading word, organism supplementary concept word, protocol supplementary concept word, rare disease supplementary concept word, unique identifier, synonyms] 5224091
- 10 8 or 9 5430660
- 11 exp Aged/ 3277792
- 12 exp Geriatrics/ 30564
- 13 Aging/ 236960
- 14 Health Services for the Aged/ 18030
- 15 (ageing or aging or aged or elder\* or geriatric\* or old age\* or senior\* or "older adults" or "older people" or "elderly people").mp. 5965633
- 16 11 or 12 or 13 or 14 or 15 5965633
- 17 7 and 10 and 16 2163

**Table S1.** Quality Assessment.

| Author/year/<br>country/<br>Tool used                       | Question<br>1 | Question<br>2 | Question<br>3 | Question<br>4 | Question<br>5 | Question<br>6 | Question<br>7 | Question<br>8 | Question<br>9 | Question<br>10 | Question<br>11 | Question<br>12 | Question<br>13 | Question<br>14 | Quality<br>Rating |
|-------------------------------------------------------------|---------------|---------------|---------------|---------------|---------------|---------------|---------------|---------------|---------------|----------------|----------------|----------------|----------------|----------------|-------------------|
| Baffert 2021<br>France<br>NHLBI*                            | Yes           | Yes           | Yes           | Yes           | No            | No            | Yes           | NA            | NA            | No             | Yes            | NA             | NA             | Yes            | Fair              |
| Bartels 2021<br>Netherlands<br>NHLBI*                       | Yes           | Yes           | Yes           | Yes           | No            | Yes           | Yes           | NA            | NA            | Yes            | Yes            | NA             | NA             | No             | Good              |
| Jeppesen<br>2021<br>Denmark<br>NHLBI*                       | Yes           | Yes           | Yes           | Yes           | No            | No            | Yes           | NA            | NA            | No             | Yes            | NA             | NA             | Yes            | Fair              |
| Koinig 2021<br>Austria<br>NHLBI*                            | Yes           | Yes           | NR            | Yes           | No            | Yes           | Yes           | NA            | NA            | No             | Yes            | NA             | NA             | Yes            | Good              |
| Büssing<br>2021<br>Germany<br>NHLBI*                        | Yes           | Yes           | NR            | No            | No            | No            | Yes           | NA            | NA            | Yes            | Yes            | NA             | NA             | Yes            | Fair              |
| Büssing<br>2020<br>Germany<br>MMAT§<br>Quant<br>descriptive | Yes           | Yes           | Yes           | Yes           | Yes           |               |               |               |               |                |                |                |                |                | Good              |
| Catania<br>2020<br>Italy<br>MMAT§<br>Quant<br>descriptive   | Yes           | Yes           | CD            | CD            | Yes           |               |               |               |               |                |                |                |                |                | Fair              |
| Hyland 2021<br>USA<br>JBI Qual¶                             | Unclear       | Unclear       | Unclear       | Unclear       | Unclear       | No            | No            | No            | Yes           | No             |                |                |                |                | Poor              |
| Haase 2021<br>Canada<br>JBI Qual¶                           | Unclear       | Yes           | Yes           | Yes           | Yes           | No            | No            | Yes           | Yes           | Yes            |                |                |                |                | Fair              |
| Galica 2021<br>Canada<br>MMAT§                              | Yes           | Yes           | Yes           | CD            | 1.2 Yes       | 1.2 Yes       | 1.3 Yes       | 1.4 Yes       | 1.5 Yes       | 4.1 Yes        | 4.2 Yes        | 4.3 CD         | 4.4 CD         | 4.5 CD         | Fair              |

Overall appraisal- Good or Strong, Fair or Moderate, or Poor Question- Yes/ No/ CD, cannot determine/ NA, not applicable/ NR, not reported \*NHLBI- National Heart, Lung and Blood Institute Quality Assessment Tool for Observational Cohort and Cross-Sectional Studies; § MMAT- Mixed Methods Appraisal Tool; ¶ JBI- Joanne Briggs Institute Critical Appraisal Tool.
